# Supplementary material for: Reconstruction of Cellular Signal Transduction Networks Using Perturbation Assays and Linear Programming
Source: PubMed Central journal article supplement (PMC3728289; doi:10.1371/journal.pone.0069220), 2013-07-30
Supplement: pone.0069220.s004.pdf [file pone.0069220.s004.pdf]

Supplementary Table 1: Evaluation results on T-Cell signaling using the transitively closed true network. TP = true positives, TN = true negatives, FP = false positives, SP = specificity, SN = sensitivity, PR = precision, AC = accuracy. The values which are significantly different to random with a p-value  $< 0.0001$ , respectively  $< 0.05$  are marked with \*\*, respectively with \*.

|    | <b>DEPN</b> | <b>random</b> |
|----|-------------|---------------|
| TP | 5           | 15.32         |
| TN | 76          | 54.32         |
| FP | 4           | 25.68         |
| FN | 36          | 25.68         |
| SP | 0.95**      | 0.68          |
| SN | 0.12**      | 0.37          |
| PR | 0.56**      | 0.37          |
| AC | 0.67*       | 0.58          |
