# Supplementary material for: Reconstruction of Cellular Signal Transduction Networks Using Perturbation Assays and Linear Programming
Source: PubMed Central journal article supplement (PMC3728289; doi:10.1371/journal.pone.0069220), 2013-07-30
Supplement: pone.0069220.s006.pdf [file pone.0069220.s006.pdf]

Supplementary Table 3: Median $\pm$ MAD of inferred edge weights  $w_{ij}$  using the LP model on the ErbB signaling data where  $i$  corresponds to genes of the  $i$ th row and  $j$  to genes of the  $j$ th column. If the MAD is not given explicitly, it is equal to zero.

|           | CDK2             | CDK4            | CDK6 | Cyclin D1 | Cyclin E1 | ERalpha          | ERBB1           | ERBB2 | ERBB3 | IGF1R | MYC             | p27              | pAKT1           | pERK1/2         | pRBI            |                  |
|-----------|------------------|-----------------|------|-----------|-----------|------------------|-----------------|-------|-------|-------|-----------------|------------------|-----------------|-----------------|-----------------|------------------|
| CDK2      | 0                | 0               | 0    | 0         | 0         | 0                | 0               | 0     | 0     | 0     | 0               | -0.14 $\pm$ 0.21 | 0               | 0.25 $\pm$ 0.37 | 0               | 0.33 $\pm$ 0.27  |
| CDK4      | 0                | 0               | 0    | 0         | 0         | 0.4 $\pm$ 0.05   | 0               | 0.69  | 0     | 0     | 0               | 0                | 0               | 0               | 0               | 0.44 $\pm$ 0.18  |
| CDK6      | 0                | 0               | 0    | 0         | 0         | 0.95             | 0               | 0     | 0     | 0     | 0               | 0                | 0               | 0               | 0               | 0                |
| Cyclin D1 | -0.36 $\pm$ 0.05 | 0               | 0    | 0         | 0         | 0                | 0               | 0     | 0     | 0     | 0               | 0.39 $\pm$ 0.02  | 0.59 $\pm$ 0.32 | 0.16 $\pm$ 0.06 | 0.18 $\pm$ 0.03 | 0.01 $\pm$ 0.02  |
| Cyclin E1 | 0                | 0               | 0    | 0         | 0         | 0                | 0               | 0     | 0     | 0.95  | 0               | 0                | 0               | 0               | 0               | 0                |
| ERalpha   | 0                | 0               | 0    | 0         | 0         | 0                | 0               | 0     | 0     | 0     | 0               | 0                | 0               | 0               | 0               | 0                |
| ERBB1     | 0                | 0               | 0    | 0         | 0         | 0                | 0               | 0.21  | 0     | 0     | 0               | -0.2 $\pm$ 0.07  | 0.36            | 0.03 $\pm$ 0.05 | 0               | -0.04 $\pm$ 0.06 |
| ERBB2     | 1 $\pm$ 0.07     | 0.21 $\pm$ 0.05 | 0    | 0         | 0         | 0                | 0.42 $\pm$ 0.06 | 0     | 0     | 0     | 0               | 0                | 0               | 0               | 0               | -0.02 $\pm$ 0.03 |
| ERBB3     | 0                | 0               | 0    | 0         | 0         | 0                | 0               | 0     | 0     | 0     | 0               | 0                | 0               | 0               | 0               | 0                |
| IGF1R     | 0                | 0               | 0    | 0         | 0.95      | 0                | 0               | 0     | 0     | 0     | 0               | 0                | 0               | 0               | 0               | 0                |
| MYC       | 0                | 0               | 0.95 | 0         | 0         | 0                | 0               | 0     | 0     | 0     | 0               | 0                | 0               | 0               | 0               | 0                |
| p21       | -1.07 $\pm$ 0.15 | 0               | 0    | 0         | 0         | 0                | 0               | 0     | 0     | 0     | 0               | 0                | 0               | 0               | 1.62 $\pm$ 0.03 | 0                |
| p27       | 0                | 0.25            | 0    | 0.7       | 0         | 0                | 0               | 0     | 0     | 0     | 0               | 0                | 0               | 0               | 0               | 0                |
| pAKT1     | 0                | 0               | 0    | 0.26      | 0         | 0                | 0               | 0     | 0     | 0     | 0               | 0                | -0.2 $\pm$ 0.3  | 0               | 0               | 0.31 $\pm$ 0.15  |
| pERK1.2   | 0 $\pm$ 0.01     | 0               | 0    | 0         | 0         | -0.02 $\pm$ 0.02 | 0               | 0     | 0     | 0     | 0               | 0.72 $\pm$ 0.14  | 0               | 0               | 0               | 0                |
| pRBI      | 0.45 $\pm$ 0.11  | 0.67 $\pm$ 0.05 | 0    | 0.05      | 0         | 0.06             | 0               | 0     | 0     | 0     | 0.06 $\pm$ 0.08 | 0.35 $\pm$ 0.19  | -0.6 $\pm$ 0.06 | 0               | 0               | 0                |
